# Supplementary material
Source: PubMed Central journal article supplement (PMC2424148)
Supplement: blood-2008-01-132837_1.pdf [file blood-2008-01-132837_1.pdf]

# Combination Chemotherapy in Treating Children With Newly Diagnosed Acute Lymphoblastic Leukemia

**This study has been completed.**

Information provided by National Cancer Institute (NCI)

Please refer to this study by its [ClinicalTrials.gov](https://clinicaltrials.gov/ct2/show/study/NCT00005596) identifier: **NCT00005596**

## Locations

### United States, Alabama

Comprehensive Cancer Center at University of Alabama at Birmingham

Birmingham, Alabama, United States, 35233

University of South Alabama Cancer Research Institute

Mobile, Alabama, United States, 36604

### United States, Arizona

Arizona Cancer Center at University of Arizona Health Sciences Center

Tucson, Arizona, United States, 85724

### United States, Arkansas

Arkansas Cancer Research Center at University of Arkansas for Medical Sciences

Little Rock, Arkansas, United States, 72205

### United States, California

Children's Hospital and Health Center, San Diego

San Diego, California, United States, 92123-4282

Kaiser Permanente Medical Center - Santa Clara

Santa Clara, California, United States, 95051-5386

Kaiser Permanente Medical Center/Kaiser Foundation Hospital - San Diego

San Diego, California, United States, 92120

Rebecca and John Moores UCSD Cancer Center

La Jolla, California, United States, 92093-0658

Stanford Cancer Center at Stanford University Medical Center  
Palo Alto, California, United States, 94304-1812

Sutter Cancer Center  
Sacramento, California, United States, 95816

University of California Davis Cancer Center  
Sacramento, California, United States, 95817

### **United States, Connecticut**

Yale Comprehensive Cancer Center  
New Haven, Connecticut, United States, 06520-8064

### **United States, Florida**

All Children's Hospital  
St. Petersburg, Florida, United States, 33701

Baptist-South Miami Regional Cancer Program  
Miami, Florida, United States, 33176-2197

Broward General Medical Center  
Fort Lauderdale, Florida, United States, 33316

Children's Hospital of Southwest Florida  
Fort Myers, Florida, United States, 33908

Florida Hospital Cancer Institute  
Orlando, Florida, United States, 32804

Joe DiMaggio Children's Hospital at Memorial  
Hollywood, Florida, United States, 33021

Kaplan Cancer Center at St. Mary's Medical Center  
West Palm Beach, Florida, United States, 33407

Sacred Heart Children's Hospital  
Pensacola, Florida, United States, 32504

Nemours Children's Clinic  
Jacksonville, Florida, United States, 32207

Nemours Children's Clinic-Orlando  
Orlando, Florida, United States, 32806

Miami Children's Hospital  
Miami, Florida, United States, 33155

St. Joseph's Children's Hospital  
Tampa, Florida, United States, 33677-4227

University of Florida Shands Cancer Center  
Gainesville, Florida, United States, 32610-0296

University of Miami Sylvester Comprehensive Cancer Center  
Miami, Florida, United States, 30101

**United States, Georgia**

AFLAC Cancer Center and Blood Disorders Service of Children's  
Healthcare of Atlanta - Scottish Rite Campus

Atlanta, Georgia, United States, 30342

MBCOP-Medical College of Georgia Cancer Center

Augusta, Georgia, United States, 30912-4000

**United States, Hawaii**

Cancer Research Center of Hawaii

Honolulu, Hawaii, United States, 96813

Tripler Army Medical Center

Honolulu, Hawaii, United States, 96859-5000

**United States, Illinois**

Advocate Hope Children's Hospital

Oak Lawn, Illinois, United States, 60453

Children's Memorial Hospital - Chicago

Chicago, Illinois, United States, 60614

Rush University Medical Center

Chicago, Illinois, United States, 60612

Saint Jude Midwest Affiliate

Peoria, Illinois, United States, 61637

**United States, Kansas**

Wesley Medical Center

Wichita, Kansas, United States, 67214

Kansas Masonic Cancer Research Institute at the University of  
Kansas Medical Center

Kansas City, Kansas, United States, 66160-7357

Via Christi Cancer Center at Via Christi Regional Medical Center

Wichita, Kansas, United States, 67214

CCOP - Wichita

Wichita, Kansas, United States, 67214-3882

**United States, Louisiana**

Children's Hospital of New Orleans

New Orleans, Louisiana, United States, 70118

MBCCOP - LSU Health Sciences Center

New Orleans, Louisiana, United States, 70112

Ochsner Cancer Institute at Ochsner Clinic Foundation

New Orleans, Louisiana, United States, 70121

Tulane Cancer Center at Tulane University Hospital and  
Clinic

New Orleans, Louisiana, United States, 70112

**United States, Maine**

Maine Children's Cancer Program

Scarborough, Maine, United States, 04074-9308

Pediatric Specialty Clinic at Eastern Maine Medical Center

Bangor, Maine, United States, 04401

**United States, Maryland**

Greenebaum Cancer Center at University of Maryland  
Medical Center

Baltimore, Maryland, United States, 21201-1595

Sidney Kimmel Comprehensive Cancer Center at Johns  
Hopkins

Baltimore, Maryland, United States, 21231-2410

Walter Reed Army Medical Center

Silver Spring, Maryland, United States, 20910

**United States, Massachusetts**

Dana-Farber/Harvard Cancer Center at Dana Farber  
Cancer Institute

Boston, Massachusetts, United States, 02115

Floating Hospital for Children

Boston, Massachusetts, United States, 02111

Massachusetts General Hospital Cancer Center

Boston, Massachusetts, United States, 02114-2696

UMASS Memorial Cancer Center - University Campus

Worcester, Massachusetts, United States, 01655

**United States, Michigan**

Children's Hospital of Michigan

Detroit, Michigan, United States, 48201

Hurley Medical Center

Flint, Michigan, United States, 48503

Van Elslander Cancer Center at St. John Hospital and  
Medical Center

Detroit, Michigan, United States, 48236

**United States, Mississippi**

Keesler Medical Center - Keesler Air Force Base

Keesler AFB, Mississippi, United States, 39534-2511

University of Mississippi Medical Center

Jackson, Mississippi, United States, 39216-4505

**United States, Missouri**

Cardinal Glennon Children's Hospital

Saint Louis, Missouri, United States, 63104

St. Louis Children's Hospital

Saint Louis, Missouri, United States, 63110

University of Missouri - Columbia

Columbia, Missouri, United States, 65203

**United States, New Hampshire**

Norris Cotton Cancer Center at Dartmouth-Hitchcock  
Medical Center

Lebanon, New Hampshire, United States, 03756

**United States, New Jersey**

Cancer Center at Hackensack University Medical Center

Hackensack, New Jersey, United States, 07601

**United States, New Mexico**

University of New Mexico Cancer Research and Treatment  
Center

Albuquerque, New Mexico, United States, 87131

### **United States, New York**

Beth Israel Medical Center - Singer Division

New York, New York, United States, 10128

James P. Wilmot Cancer Center at University of Rochester  
Medical Center

Rochester, New York, United States, 14642

Long Island Cancer Center at Stony Brook University Hospital

Stony Brook, New York, United States, 11794

SUNY Upstate Medical University Hospital

Syracuse, New York, United States, 13210

Roswell Park Cancer Institute

Buffalo, New York, United States, 14263-0001

Schneider Children's Hospital

New Hyde Park, New York, United States, 11042

Mount Sinai Medical Center

New York, New York, United States, 10029

### **United States, North Carolina**

Blumenthal Cancer Center at Carolinas Medical Center

Charlotte, North Carolina, United States, 28232-2861

Comprehensive Cancer Center at Wake Forest University

Winston-Salem, North Carolina, United States, 27157-1081

Duke Comprehensive Cancer Center

Durham, North Carolina, United States, 27710

Leo W. Jenkins Cancer Center at Pitt County Memorial Hospital

Greenville, North Carolina, United States, 27858-4354

Mission Hospitals - Memorial Campus

Asheville, North Carolina, United States, 28801

Presbyterian Cancer Center at Presbyterian Hospital

Charlotte, North Carolina, United States, 28233

### **United States, Oklahoma**

Natalie Warren Bryant Cancer Center at St. Francis Hospital

Tulsa, Oklahoma, United States, 74136

Oklahoma University Medical Center

Oklahoma City, Oklahoma, United States, 73104

**United States, Oregon**

CCOP - Columbia River Oncology Program

Portland, Oregon, United States, 97225

Legacy Emanuel Hospital and Health Center & Children's Hospital

Portland, Oregon, United States, 97227

**United States, Pennsylvania**

St. Christopher's Hospital for Children

Philadelphia, Pennsylvania, United States, 19134-1095

**United States, Rhode Island**

Rhode Island Hospital

Providence, Rhode Island, United States, 02903

**United States, South Carolina**

Children's Hospital of Greenville Hospital System

Greenville, South Carolina, United States, 29605

Hollings Cancer Center at Medical University of South Carolina

Charleston, South Carolina, United States, 29425-0721

**United States, Tennessee**

East Tennessee State University Cancer Center at Johnson City Medical Center

Johnson City, Tennessee, United States, 37614-0622

St. Jude Children's Research Hospital

Memphis, Tennessee, United States, 38105

**United States, Texas**

San Antonio Military Pediatric Cancer and Blood Disorders Center

Lackland Air Force Base, Texas, United States, 78236

Center for Cancer Prevention and Care at Scott and White Clinic

Temple, Texas, United States, 76508

Cook Children's Medical Center - Fort Worth

Fort Worth, Texas, United States, 76104

Driscoll Children's Hospital  
Corpus Christi, Texas, United States, 78466  
MBCCOP - South Texas Pediatrics  
San Antonio, Texas, United States, 78229-3900  
Medical City Dallas Hospital  
Dallas, Texas, United States, 75230  
CCOP - Scott and White Hospital  
Temple, Texas, United States, 76508  
Simmons Cancer Center at University of Texas Southwestern  
Medical Center - Dallas  
Dallas, Texas, United States, 75390-9063  
Texas Children's Cancer Center and Hematology Service at  
Texas Children's Hospital  
Houston, Texas, United States, 77030-2399  
University of Texas Health Science Center at San Antonio  
San Antonio, Texas, United States, 78207  
University of Texas Medical Branch  
Galveston, Texas, United States, 77555-0209

**United States, Vermont**

Vermont Cancer Center at University of Vermont  
Burlington, Vermont, United States, 05401-3498

**United States, Virginia**

Cancer Center at the University of Virginia  
Charlottesville, Virginia, United States, 22908  
Carilion Medical Center for Children at Roanoke Community  
Hospital  
Roanoke, Virginia, United States, 24029  
INOVA Fairfax Hospital  
Falls Church, Virginia, United States, 22042-3300  
Massey Cancer Center at Virginia Commonwealth University  
Richmond, Virginia, United States, 23298-0212  
Naval Medical Center - Portsmouth  
Portsmouth, Virginia, United States, 23708-5100

**United States, Washington**

Madigan Army Medical Center  
Tacoma, Washington, United States, 98431-0001



**United States, West Virginia**

Mary Babb Randolph Cancer Center at West Virginia University  
Hospitals

Morgantown, West Virginia, United States, 26506-9300

West Virginia University - Robert C. Byrd Health Sciences  
Center - Charleston Division

Charleston, West Virginia, United States, 25302

**United States, Wisconsin**

CCOP - Marshfield Clinic Research Foundation

Marshfield, Wisconsin, United States, 54449

Midwest Children's Cancer Center

Milwaukee, Wisconsin, United States, 53226

St. Vincent Hospital

Green Bay, Wisconsin, United States, 54307-9070

**Australia, New South Wales**

Children's Hospital at Westmead

Westmead, New South Wales, Australia, 2145

**Australia, Queensland**

Royal Children's Hospital

Brisbane, Queensland, Australia, 4029

**Australia, Victoria**

Royal Children's Hospital

Parkville, Victoria, Australia, 3052

**Canada, Alberta**

Alberta Children's Hospital

Calgary, Alberta, Canada, T2T 5C7

Cross Cancer Institute

Edmonton, Alberta, Canada, T6G 1Z2

**Canada, Ontario**

Children's Hospital of Eastern Ontario

Ottawa, Ontario, Canada, K1H 8L1

Hospital for Sick Children  
Toronto, Ontario, Canada, M5G 1X8  
McMaster Children's Hospital at Hamilton Health Sciences  
Hamilton, Ontario, Canada, L8S 4J9

**Canada, Quebec**

Centre de Recherche du Centre Hospitalier de l'Universite  
Laval  
Sainte Foy, Quebec, Canada, G1V 4G2  
Hopital Sainte Justine  
Montreal, Quebec, Canada, H3T 1C5  
Montreal Children's Hospital at McGill University Health Center  
  
Montreal, Quebec, Canada, H3G 1A4

**Netherlands**

University Medical Center Groningen  
Groningen, Netherlands, 9700 RB

**Puerto Rico**

San Jorge Children's Hospital  
Santurce, Puerto Rico, 00912

**Switzerland**

Swiss Pediatric Oncology Group Bern  
Bern, Switzerland, CH 3010  
Swiss Pediatric Oncology Group Geneva  
Geneva, Switzerland, CH 1211
