# Supplementary material
Source: PubMed Central journal article supplement (PMC2424148)
Supplement: blood-2008-01-132837_2.pdf [file blood-2008-01-132837_2.pdf]

|                                                            | TREATMENT PHASE/DRUG             | DAILY DOSE                                    | DAYS GIVEN                                                   |
|------------------------------------------------------------|----------------------------------|-----------------------------------------------|--------------------------------------------------------------|
| <b>4-DRUG INDUCTION</b>                                    |                                  |                                               |                                                              |
|                                                            | PREDNISONE                       | 40 mg/m <sup>2</sup> (MAX 60 mg)              | 1-28                                                         |
|                                                            | VINCRIStINE                      | 1.5 mg/m <sup>2</sup> (MAX 2 mg)              | 1, 8, 15, 22                                                 |
|                                                            | L-ASPARIGNASE (IM)               | 10,000 IU/m <sup>2</sup>                      | 2, 5, 8, 12, 15, 19                                          |
|                                                            | DAUNORUBICIN                     | 30 mg/m <sup>2</sup>                          | 8, 15, 22                                                    |
|                                                            | METHOTREXATE (IT)                | Age adjusted doses                            | 1, 8; ALSO 15, 22 if CNS 2 or 3                              |
| <b>3-DRUG INDUCTION</b>                                    |                                  |                                               |                                                              |
|                                                            | DEXAMETHASONE                    | 6 mg/m <sup>2</sup>                           | 1-28                                                         |
|                                                            | VINCRIStINE                      | 1.5 mg/m <sup>2</sup> (MAX 2 mg)              | 1, 8, 15, 22                                                 |
|                                                            | L-ASPARAGINASE (IM) <sup>▲</sup> | 10,000 IU/m <sup>2</sup>                      | 2, 5, 8, 12, 15, 19                                          |
|                                                            | PEG ASPARAGINASE (IM) *          | 2500 IU/m <sup>2</sup>                        | 4, 5, or 6                                                   |
|                                                            | METHOTREXATE (IT)                | Age adjusted doses                            | 1 <sup>▲</sup> , 8; also 15, 22 if CNS 2 or 3                |
|                                                            | CYTARABINE (IT)                  | Age adjusted doses                            | 1*                                                           |
| <b>CONSOLIDATION</b> Regimens A/B<br>(Random Assignment)   |                                  |                                               | WEEKS GIVEN                                                  |
| Randomized                                                 | METHOTREXATE (IV) <sup>•</sup>   | 1 gm/m <sup>2</sup> /24 HOURS                 | 7, 10, 13, 16, 19, 22                                        |
| Randomized                                                 | METHOTREXATE (IV) <sup>•</sup>   | 2 gm/m <sup>2</sup> /4 HOURS                  | 7, 10, 13, 16, 19, 22                                        |
|                                                            | METHOTREXATE (IT)                | Age adjusted doses                            | 7, 10, 13, 16, 19, 22                                        |
|                                                            | 6-MERCAPTOPYRINE                 | 50 mg/m <sup>2</sup>                          | 5-24                                                         |
|                                                            | VINCRIStINE                      | 1.5 mg/m <sup>2</sup> (MAX 2 mg)              | 8, 9, 17, 18                                                 |
|                                                            | DEXAMETHASONE                    | 6 mg/m <sup>2</sup> /daily x 7 days           | 8, 17                                                        |
| <b>CONSOLIDATION</b> Regimens C/D<br>(Random Assignment)   |                                  |                                               | WEEKS GIVEN                                                  |
| Randomized                                                 | METHOTREXATE (IV) <sup>•</sup>   | 1 gm/m <sup>2</sup> /24 HOURS                 | 7, 10, 13, 24, 27, 30                                        |
| Randomized                                                 | METHOTREXATE (IV) <sup>•</sup>   | 2 gm/m <sup>2</sup> /4 HOURS                  | 7, 10, 13, 24, 27, 30                                        |
|                                                            | METHOTREXATE (IT)                | Age adjusted doses                            | 7, 10, 13, 16, 20, 21, 30                                    |
|                                                            | 6-MERCAPTOPYRINE                 | 50 mg/m <sup>2</sup>                          | 5-13 and 24-32                                               |
|                                                            | VINCRIStINE                      | 1.5 mg/m <sup>2</sup> (MAX 2 mg)              | 8, 9, 16, 17, 18, 28, 29                                     |
|                                                            | DEXAMETHASONE                    | 6 mg/m <sup>2</sup> /daily x 7 days           | 8, 16-18, 28                                                 |
|                                                            | DAUNOMYCIN                       | 30 mg/m <sup>2</sup>                          | 16, 17, 18                                                   |
|                                                            | PEG-ASPARAGINASE                 | 2500 IU/m <sup>2</sup>                        | Day 4 of week 16                                             |
|                                                            | CYCLOPHOSPHAMIDE                 | 1 gm/m <sup>2</sup>                           | Day 1 of week 20                                             |
|                                                            | CYTARABINE                       | 75 m/m <sup>2</sup> IV or subcutaneously      | Days 2-5 of weeks 20 and 21                                  |
|                                                            | 6-THIOGUANINE                    | 60 mg/m <sup>2</sup> po qhs                   | Weeks 20-21                                                  |
| <b>INTENSIVE CONTINUATION</b><br>(9905 ONLY, ALL PATIENTS) |                                  |                                               |                                                              |
|                                                            | DIVIDED DOSE ORAL METHOTREXATE** | 25 mg/m <sup>2</sup> po every 6 hrs x 4 doses | 25, 27, 29, 31,...71 (Reg A/B);<br>33, 35, 37, 39,...79 (Reg |

| 6-MERCAPTOPYRINE     | 75 mg/m <sup>2</sup> po q hs        | C/D)<br>25-72 (Reg A/B)<br>33-80 (Reg C/D) |
|----------------------|-------------------------------------|--------------------------------------------|
| IT METHOTREXATE      | Age adjusted doses                  | Every 12 weeks x 4<br>doses                |
| VINCRIStINE          | 1.5 mg/m <sup>2</sup> (MAX 2 mg)    | Every 12 weeks x 4<br>doses                |
| DEXAMETHASONE        | 6 mg/m <sup>2</sup> /daily x 7 days | Every 12 weeks x 4                         |
| TREATMENT PHASE/DRUG | DAILY DOSE                          | DAYS GIVEN                                 |

**CONTINUATION (ALL PATIENTS)**

|                   |                                     |                                                          |
|-------------------|-------------------------------------|----------------------------------------------------------|
| METHOTREXATE      | 20 mg/m <sup>2</sup>                | Weekly until week 130                                    |
| VINCRIStINE       | 1.5 mg/m <sup>2</sup> (MAX 2 mg)    | Day 1, every 12 weeks until week 130; 9904 also on day 8 |
| DEXAMETHASONE     | 6 mg/m <sup>2</sup> /daily x 7 days | Every 12 weeks until week 130                            |
| 6-MERCAPTOPYRINE  | 75 mg/m <sup>2</sup> po q hs        | 73-130 (Reg A/B)<br>81-130 (Reg C/D)                     |
| METHOTREXATE (IT) | Age adjusted doses                  | Every 12 weeks until week 130                            |

▲: Pre-Amendment

\*: Post-Amendment, 10/07/2003

●: Leucovorin given at 10 mg/m<sup>2</sup> dose every 6 hrs x 3 doses, beginning at hour 42

\*\* : Leucovorin given at 5 mg/m<sup>2</sup>/dose every 12 hrs x 2 doses, beginning at hour 48
