# Supplementary material
Source: PubMed Central journal article supplement (PMC2424148)
Supplement: blood-2008-01-132837_3.pdf [file blood-2008-01-132837_3.pdf]

| TREATMENT PHASE/DRUG                                             | DAILY DOSE                                                                | DAYS GIVEN                                     |
|------------------------------------------------------------------|---------------------------------------------------------------------------|------------------------------------------------|
| <b>4-DRUG INDUCTION (weeks 1-4)</b>                              |                                                                           |                                                |
| PREDNISONE (PO)                                                  | 40 mg/m <sup>2</sup> (MAX 60 mg)                                          | 1-28                                           |
| VINCRIStINE (IV)                                                 | 1.5 mg/m <sup>2</sup> (MAX 2 mg)                                          | 1, 8, 15, 22                                   |
| E COLI L-ASPARAGINASE (IM)                                       | 10,000 IU/m <sup>2</sup>                                                  | 2, 5, 8, 12, 15, 19                            |
| DAUNORUBICIN (IV)                                                | 30 mg/m <sup>2</sup>                                                      | 8, 15, 22                                      |
| METHOTREXATE (IT)                                                | Age adjusted doses                                                        | 1, 8; ALSO 15, 22 if CNS 2 or 3                |
| <b>CONSOLIDATION (weeks 6-14)</b>                                |                                                                           | <b>DAYS GIVEN</b>                              |
| METHOTREXATE (IT)                                                | Age adjusted doses                                                        | 7, 10, 13, 16, 19, 22                          |
| 6-MERCAPTOPYRINE (PO)                                            | 50 mg/m <sup>2</sup> /day                                                 | 1-14, 29-42                                    |
| CYCLOPHOSPHAMIDE (IV)                                            | 1,000 mg/m <sup>2</sup>                                                   | 1, 29                                          |
| CYTOSINE ARABINOSIDE (SC or IV)                                  | 75 mg/m <sup>2</sup> /day                                                 | 2-5, 9-12, 30-33, 37-40                        |
| VINCRIStINE (IV)                                                 | 1.5 mg/m <sup>2</sup> (MAX 2 mg)                                          | 15, 22, 43, 50                                 |
| E COLI L-ASPARAGINASE (IM)                                       | 6,000 IU/m <sup>2</sup>                                                   | 15, 17, 19, 22, 24, 26, 43, 45, 47, 50, 52, 54 |
| <b>INTERIM MAINTENANCE (weeks 15-22; repeat on weeks 31-38)</b>  |                                                                           | <b>DAYS GIVEN</b>                              |
| METHOTREXATE (IV)                                                | 100 mg/m <sup>2</sup> ; escalate by 50 mg/m <sup>2</sup> if no toxicities | 1, 11, 21, 31, 41                              |
| METHOTREXATE (IT)                                                | Age adjusted doses                                                        | 1, 31                                          |
| VINCRIStINE (IV)                                                 | 1.5 mg/m <sup>2</sup> (MAX 2 mg)                                          | 1, 11, 21, 31, 41                              |
| E COLI ASPARAGINASE (IM)                                         | 6,000 IU/m <sup>2</sup>                                                   | Day 4 of week 16                               |
| <b>DELAYED INTENSIFICATION (weeks 23-30; repeat weeks 39-46)</b> |                                                                           | <b>DAYS GIVEN</b>                              |
| DEXAMETHASONE (PO)                                               | 10 mg/m <sup>2</sup>                                                      | 1-7, 15-21                                     |
| VINCRIStINE (IV)                                                 | 1.5 mg/m <sup>2</sup> (MAX 2 mg)                                          | 1, 8, 15, 43, 50                               |
| E COLI ASPARAGINASE (IM)                                         | 6,000 IU/m <sup>2</sup>                                                   | 4, 6, 8, 11, 13, 15, 43, 45, 47, 50, 52, 54    |
| DOXORUBICIN (IV)                                                 | 25 mg/m <sup>2</sup>                                                      | 1, 8, 15                                       |
| METHOTREXATE (IT)                                                | Age adjusted doses                                                        | 1, 29                                          |
| THIOGUANINE (PO)                                                 | 60 mg/m <sup>2</sup>                                                      | 29-42                                          |
| CYTOSINE ARABINOSIDE (SC or IV)                                  | 75 mg/m <sup>2</sup>                                                      | 30-33, 37-40                                   |
| CYCLOPHOSPHAMIDE (IV)                                            | 1,000 mg/m <sup>2</sup>                                                   | 29                                             |
| <b>CONTINUATION (weeks 47-130; repeated 12 week courses)</b>     |                                                                           | <b>DAYS GIVEN</b>                              |
| METHOTREXATE                                                     | 20 mg/m <sup>2</sup>                                                      | 8, 15, 22, 29, 36, 43, 50, 57, 64, 71, 78      |

|                                      |                                                                                                                                                                                           |                                                                       |
|--------------------------------------|-------------------------------------------------------------------------------------------------------------------------------------------------------------------------------------------|-----------------------------------------------------------------------|
| 6-MERCAPTOPYRINE ((PO)               | 75 mg/m <sup>2</sup>                                                                                                                                                                      | 1-84                                                                  |
| IT METHOTREXATE                      | Age adjusted doses                                                                                                                                                                        | 1 (if patient received cranial XRT, omit IT and give PO dose instead) |
| VINCRISTINE                          | 1.5 mg/m <sup>2</sup> (MAX 2 mg)                                                                                                                                                          | 1, 29, 57                                                             |
| DEXAMETHASONE                        | 6 mg/m <sup>2</sup>                                                                                                                                                                       | 1-5, 29-33, 57-61                                                     |
| <hr/>                                |                                                                                                                                                                                           |                                                                       |
| <b>CNS IRRADIATION (weeks 47-48)</b> | 1800 cGy in 10 fractions for patients with CNS 3 at diagnosis; <b>after May 2004</b> , given to all patients with an initial WBC $\geq$ 100,000/ul who were within 24 months of diagnosis |                                                                       |
| <hr/>                                |                                                                                                                                                                                           |                                                                       |
